# Supplementary material for: Polymorphisms in ARNTL/BMAL1 and CLOCK Are Not Associated with Multiple Sclerosis in Spanish Population
Source: MDPI journal article supplement (doi:10.3390/biology11101417), 2022-09-28
Supplement: s1 [file s1]

# Logistic regression and stratified analyses for rs3789327

Logistic regression of the SNP

| <b>Rs3789327</b>    | <b>OR (95% CI)</b> | <b>P</b> |
|---------------------|--------------------|----------|
| CC vs. Carrier of T | 1.13 (0.89-1.44)   | 0.30     |

SNP adjusted by sex, HLA and clinical form

| <b>Rs3789327</b>    | <b>OR (95% CI)</b> | <b>P</b> |
|---------------------|--------------------|----------|
| CC vs. Carrier of T | 1.06 (0.77-1.47)   | 0.71     |
| Sex male            | 1.52 (1.13-2.03)   | 0.005    |
| Sex female          | 4.13 (1.06-16.11)  | 0.041    |
| HLA-DRB1*1501       | 3.10 (2.23-4.31)   | <0.001   |
| Clinical form       | --                 | --       |

## Analysis stratified by sex

| <b>ARNTL rs3789327</b> | <b>FemaleMS</b> |      | <b>FemaleControls</b> |      | <b>p</b>                    |
|------------------------|-----------------|------|-----------------------|------|-----------------------------|
|                        | N               | %    | N                     | %    |                             |
| TT                     | 165             | 26.4 | 87                    | 24.0 | 0.07*                       |
| TC                     | 324             | 51.9 | 175                   | 48.3 |                             |
| CC                     | 135             | 21.6 | 100                   | 27.6 |                             |
| CC vs Carrier of T     | 489             | 78.4 | 262                   | 72.4 | 0.04 (OR=1.38 [1.02-1.86])* |
|                        | <b>Male MS</b>  |      | <b>MaleControls</b>   |      | 0.92                        |
| TT                     | 78              | 25.2 | 51                    | 22.1 |                             |
| TC                     | 157             | 50.6 | 130                   | 56.3 |                             |
| CC                     | 75              | 24.2 | 50                    | 21.6 |                             |
| CC vs Carrier of T     | 235             | 75.8 | 181                   | 78.4 | 0.53                        |

\*Statistical comparisons do not stand Bonferroni correction (p\*2)

## Analysis stratified by clinical form

| <b>ARNTLrs3789327</b> | <b>RR</b> |      | <b>SP</b> |      | <b>PP</b> |      |
|-----------------------|-----------|------|-----------|------|-----------|------|
|                       | N         | %    | N         | %    | N         | %    |
| TT                    | 111       | 25.4 | 23        | 27.1 | 3         | 16.7 |
| CT                    | 226       | 51.7 | 43        | 50.6 | 7         | 38.9 |
| CC                    | 100       | 22.9 | 19        | 22.4 | 8         | 44.4 |

RR vs SP p=0.79 RR vs PP p=0.07\* SP vs PP p=0.08\*

RR: Relapsing remitting  
SP: secondary progressive  
PP: primary progressive

\*Statistical comparisons do not pass Bonferroni correction (p\*2). The size of the PP group is too small to draw solid conclusions

### Analysis stratified by HLA DRB\*15:01 status

| ARNTL rs3789327           | MS  |      | Controls |      |      |
|---------------------------|-----|------|----------|------|------|
| Not HLA-DRB1*15:01        | N   | %    | N        | %    | P    |
| TT                        | 152 | 24.8 | 100      | 24.6 | 0.42 |
| CT                        | 329 | 53.6 | 204      | 50.3 |      |
| CC                        | 133 | 21.6 | 102      | 25.1 |      |
| HLA-DRB1*15:01 / X        |     |      |          |      |      |
| TT                        | 82  | 28.3 | 14       | 25.4 | 0.79 |
| CT                        | 139 | 47.9 | 31       | 56.4 |      |
| CC                        | 69  | 23.8 | 10       | 18.2 |      |
| HLA-DRB1*15:01 homozygote |     |      |          |      |      |
| TT                        | 7   | 24.1 | 0        | 0    | 0.61 |
| CT                        | 12  | 41.4 | 2        | 66.7 |      |
| CC                        | 10  | 34.5 | 1        | 33.3 |      |

\*Statistical comparison does not pass Bonferroni correction ( $p \times 2$ ). The control group is small and does not allow drawing solid conclusions.

# Logistic regression and stratified analysis for rs6811520

Logistic regression of the SNP

| Rs6811520           | OR (95% CI)     | P    |
|---------------------|-----------------|------|
| Cc vs. Carrier of T | 0.97 (0.72-1.3) | 0.82 |

SNP adjusted by sex, HLA and clinical form

| Rs6811520            | OR (95% CI)       | P      |
|----------------------|-------------------|--------|
| CC vis. Carrier of T | 1.09 (0.74-1.63)  | 0.645  |
| Sex male             | 1.56 (1.17-2.08)  | 0.002  |
| Sex female           | 4.03 (1.03-15.75) | 0.045  |
| HLA-DRB1*1501        | 3.31 (2.40-4.58)  | <0.001 |
| Clinical form        | --                | --     |

## Analysis stratified by sex

| <i>CLOCK</i> rs6811520 | FemaleMS |      | FemaleControls |      | p    |
|------------------------|----------|------|----------------|------|------|
|                        | N        | %    | N              | %    |      |
| TT                     | 265      | 41.5 | 154            | 42.1 | 0.83 |
| CT                     | 292      | 45.8 | 167            | 45.6 |      |
| CC                     | 81       | 12.7 | 45             | 12.3 |      |
|                        | Male MS  |      | MaleControls   |      | 0.37 |
| TT                     | 127      | 41.1 | 90             | 37.3 |      |
| CT                     | 137      | 44.3 | 112            | 46.5 |      |
| CC                     | 45       | 14.6 | 39             | 16.2 |      |

## Analysis stratified by clinical form

| <i>CLOCK</i> rs6811520 | RR  |      | SP |      | PP |      |
|------------------------|-----|------|----|------|----|------|
|                        | N   | %    | N  | %    | N  | %    |
| TT                     | 179 | 41.7 | 28 | 34.6 | 10 | 55.5 |
| CT                     | 199 | 46.4 | 42 | 51.9 | 2  | 11.2 |
| CC                     | 51  | 11.9 | 11 | 13.6 | 6  | 33.3 |

RR vs SP p=0.27; RR vs PP p=0.64; SP vs PP p=0.95

RR: Relapsing remitting

SP: secondary progressive

PP: primary progressive

### Analysis stratified by HLA DRB\*15:01 status

| <i>CLOCK</i> rs6811520    | MS  |      | Controls |      |          |
|---------------------------|-----|------|----------|------|----------|
| Not HLA-DRB1*15:01        | N   | %    | N        | %    | <i>p</i> |
| TT                        | 244 | 39.7 | 159      | 37.9 | 0.26     |
| CT                        | 292 | 47.5 | 193      | 46.1 |          |
| CC                        | 79  | 12.8 | 67       | 16.0 |          |
| HLA-DRB1*15:01 / X        |     |      |          |      |          |
| TT                        | 132 | 44.9 | 31       | 55.4 | 0.04*    |
| CT                        | 124 | 42.2 | 23       | 41.1 |          |
| CC                        | 38  | 12.9 | 2        | 3.5  |          |
| HLA-DRB1*15:01 homozygote |     |      |          |      |          |
| TT                        | 12  | 38.7 | 2        | 66.7 | 0.23     |
| CT                        | 9   | 29.0 | 1        | 33.3 |          |
| CC                        | 10  | 32.3 | 0        | 0    |          |

\*Statistical comparison does not pass Bonferroni correction ( $p \times 2$ ). The control group is small and does not allow drawing solid conclusions.
